# Supplementary material
Source: PubMed Central journal article supplement (PMC2824247)
Supplement: NIHMS164996-supplement-1.pdf [file NIHMS164996-supplement-1.pdf]

# MHC genotyping with massively parallel pyrosequencing

Roger W. Wiseman, Julie A. Karl, Benjamin N. Bimber, Claire E. O’Leary, Simon M. Lank, Jennifer J. Tuscher, Ann M. Detmer, Pascal Bouffard, Natalya Levenkova, Cynthia L. Turcotte, Edward Szekeres Jr., Chris Wright, Timothy Harkins & David H. O’Connor

| <b>Supplementary Item &amp; Number</b> | <b>Title</b>                                                                         |
|----------------------------------------|--------------------------------------------------------------------------------------|
| Supplementary Figure 1                 | Novel MHC class I sequences detected in cynomolgus, rhesus, and pig-tailed macaques. |
| Supplementary Figure 2                 | MHC class I genotypes of cynomolgus macaques.                                        |
| Supplementary Figure 3                 | MHC class I genotypes of rhesus macaques.                                            |
| Supplementary Figure 4                 | MHC class I genotypes of pig-tailed macaques.                                        |
| Supplementary Figure 5                 | Detailed analysis of sequence artifacts.                                             |
| Supplementary Figure 6                 | Additional shared MHC class I transcript abundance profiles.                         |
| Supplementary Figure 7                 | Inferred <i>Mamu-A</i> and <i>Mamu-B</i> class I haplotypes.                         |
| Supplementary Note                     |                                                                                      |

# Supplementary Figure 1.

| Cynomolgus macaques           |                          |                          | Rhesus macaques               |                          |                          | Pig-tailed macaques           |                          |                          |
|-------------------------------|--------------------------|--------------------------|-------------------------------|--------------------------|--------------------------|-------------------------------|--------------------------|--------------------------|
| Working Allele Name           | GenBank Accession Number | Representative Animal(s) | Working Allele Name           | GenBank Accession Number | Representative Animal(s) | Working Allele Name           | GenBank Accession Number | Representative Animal(s) |
| <i>Mf-A*<sup>nov001</sup></i> | GQ153320                 | AG102, AG108             | <i>Mm-A*<sup>nov001</sup></i> | GQ153351                 | LP10, CR12               | <i>Mn-A*<sup>nov001</sup></i> | GQ153452                 | PT020                    |
|                               |                          |                          | <i>Mm-A*<sup>nov002</sup></i> | GQ153352                 | NM15                     | <i>Mn-A*<sup>nov002</sup></i> | GQ153453                 | PT009, PT023             |
|                               |                          |                          | <i>Mm-A*<sup>nov003</sup></i> | GQ153353                 | CR11, NM42               | <i>Mn-A*<sup>nov003</sup></i> | GQ153454                 | PT020                    |
| <i>Mf-B*<sup>nov001</sup></i> | GQ153321                 | CY0157, CR355            | <i>Mm-A*<sup>nov004</sup></i> | GQ153354                 | CR45, NM31               | <i>Mn-A*<sup>nov004</sup></i> | GQ153455                 | PT020                    |
| <i>Mf-B*<sup>nov002</sup></i> | GQ153322                 | CY0157, CR355            | <i>Mm-A*<sup>nov006</sup></i> | GQ153355                 | LP05, LP25               | <i>Mn-A*<sup>nov005</sup></i> | GQ153456                 | PT023                    |
| <i>Mf-B*<sup>nov003</sup></i> | GQ153323                 | CY0157, CR355            | <i>Mm-A*<sup>nov007</sup></i> | GQ153356                 | LP11, LP13               | <i>Mn-A*<sup>nov006</sup></i> | GQ153457                 | PT025                    |
| <i>Mf-B*<sup>nov004</sup></i> | GQ153324                 | CY0161, AG108            | <i>Mm-A*<sup>nov008</sup></i> | GQ153357                 | LP11, LP13               | <i>Mn-A*<sup>nov007</sup></i> | GQ153458                 | PT021                    |
| <i>Mf-B*<sup>nov005</sup></i> | GQ153325                 | CY0161, AG108            | <i>Mm-A*<sup>nov009</sup></i> | GQ153358                 | LP12, LP15               | <i>Mn-A*<sup>nov008</sup></i> | GQ153459                 | PT021                    |
| <i>Mf-B*<sup>nov006</sup></i> | GQ153326                 | CY0165                   | <i>Mm-A*<sup>nov010</sup></i> | GQ153359                 | LP05                     | <i>Mn-A*<sup>nov009</sup></i> | GQ153460                 | PT022                    |
| <i>Mf-B*<sup>nov007</sup></i> | GQ153327                 | CY0165                   | <i>Mm-A*<sup>nov011</sup></i> | GQ153360                 | LP11                     | <i>Mn-A*<sup>nov010</sup></i> | GQ153461                 | PT025                    |
| <i>Mf-B*<sup>nov008</sup></i> | GQ153328                 | CY0165                   | <i>Mm-A*<sup>nov017</sup></i> | GQ153361                 | CR062                    | <i>Mn-A*<sup>nov011</sup></i> | GQ153462                 | PT021, PT027             |
| <i>Mf-B*<sup>nov010</sup></i> | GQ153329                 | CR354, CR340             | <i>Mm-A*<sup>nov018</sup></i> | GQ153362                 | CR069, NM44              | <i>Mn-A*<sup>nov012</sup></i> | FJ875218                 | PT025, PT027             |
| <i>Mf-B*<sup>nov011</sup></i> | GQ153330                 | CR352, AG102             | <i>Mm-A*<sup>nov019</sup></i> | GQ153363                 | CR12, NM36               |                               |                          |                          |
| <i>Mf-B*<sup>nov012</sup></i> | GQ153331                 | CR352, AG102             |                               |                          |                          |                               |                          |                          |
| <i>Mf-B*<sup>nov014</sup></i> | GQ153332                 | CR352, AG102             | <i>Mm-B*<sup>nov001</sup></i> | GQ153364                 | LP03, LP15               | <i>Mn-B*<sup>nov001</sup></i> | FJ875219                 | PT009, PT020             |
| <i>Mf-B*<sup>nov015</sup></i> | GQ153333                 | CR355, CR340             | <i>Mm-B*<sup>nov002</sup></i> | GQ153365                 |                          | <i>Mn-B*<sup>nov002</sup></i> | FJ875220                 | PT009, PT020             |
| <i>Mf-B*<sup>nov017</sup></i> | GQ153334                 | CR355, CR340             | <i>Mm-B*<sup>nov003</sup></i> | GQ153366                 | CR45, NM06               | <i>Mn-B*<sup>nov003</sup></i> | FJ875221                 | PT009, PT020             |
| <i>Mf-B*<sup>nov018</sup></i> | GQ153335                 | CR354, CR340             | <i>Mm-B*<sup>nov004</sup></i> | GQ153367                 | CR059, NM15              | <i>Mn-B*<sup>nov004</sup></i> | GQ153463                 | PT009, PT019             |
| <i>Mf-B*<sup>nov019</sup></i> | GQ153336                 | CR355, CR340             | <i>Mm-B*<sup>nov005</sup></i> | GQ153368                 | CR05, NM15               | <i>Mn-B*<sup>nov005</sup></i> | FJ875222                 | PT009                    |
| <i>Mf-B*<sup>nov020</sup></i> | GQ153337                 | AG102, AG109             | <i>Mm-B*<sup>nov006</sup></i> | GQ153369                 | LP10, NM15               | <i>Mn-B*<sup>nov006</sup></i> | GQ153464                 | PT009                    |
| <i>Mf-B*<sup>nov021</sup></i> | GQ153338                 | AG102, AG109             | <i>Mm-B*<sup>nov007</sup></i> | GQ153370                 | LP10, NM15               | <i>Mn-B*<sup>nov007</sup></i> | GQ153465                 | PT009, PT026             |
| <i>Mf-B*<sup>nov022</sup></i> | GQ153339                 | AG102, AG109             | <i>Mm-B*<sup>nov008</sup></i> | GQ153371                 | LP03, LP15               | <i>Mn-B*<sup>nov008</sup></i> | FJ875223                 | PT009, PT026             |
|                               |                          |                          | <i>Mm-B*<sup>nov009</sup></i> | GQ153372                 | LP03, LP15               | <i>Mn-B*<sup>nov009</sup></i> | GQ153466                 | PT009, PT026             |
| <i>Mf-E*<sup>nov001</sup></i> | GQ153340                 | CY0161, CY0165           | <i>Mm-B*<sup>nov009</sup></i> | GQ153372                 | CR04, CR055              | <i>Mn-B*<sup>nov010</sup></i> | GQ153467                 | PT009, PT019             |
| <i>Mf-E*<sup>nov002</sup></i> | GQ153341                 | CR352, AG102             | <i>Mm-B*<sup>nov010</sup></i> | GQ153373                 | LP33, NM43               | <i>Mn-B*<sup>nov011</sup></i> | GQ153468                 | PT009, PT010             |
| <i>Mf-E*<sup>nov003</sup></i> | GQ153342                 | CR355, CR340             | <i>Mm-B*<sup>nov011</sup></i> | GQ153374                 | CR45, CR50               | <i>Mn-B*<sup>nov012</sup></i> | GQ153469                 | PT009, PT026             |
| <i>Mf-E*<sup>nov004</sup></i> | GQ153343                 | CR352, AG102             | <i>Mm-B*<sup>nov012</sup></i> | GQ153375                 | LP21, CR48               | <i>Mn-B*<sup>nov013</sup></i> | GQ153470                 | PT009, PT026             |
| <i>Mf-E*<sup>nov005</sup></i> | GQ153344                 | CY0157, CR355            | <i>Mm-B*<sup>nov013</sup></i> | GQ153376                 | LP01, PJ02               | <i>Mn-B*<sup>nov014</sup></i> | FJ875224                 | PT020, PT025             |
| <i>Mf-E*<sup>nov006</sup></i> | GQ153345                 | CY0161, CY0165           | <i>Mm-B*<sup>nov014</sup></i> | GQ153377                 | CR50, NM38               | <i>Mn-B*<sup>nov015</sup></i> | GQ153471                 | PT020, PT025             |
| <i>Mf-E*<sup>nov007</sup></i> | GQ153346                 | AG102, AG109             | <i>Mm-B*<sup>nov015</sup></i> | GQ153378                 | CR51, NM38               | <i>Mn-B*<sup>nov016</sup></i> | GQ153472                 | PT020, PT025             |
| <i>Mf-E*<sup>nov008</sup></i> | GQ153347                 | CR355, CR340             | <i>Mm-B*<sup>nov016</sup></i> | GQ153379                 | CR11, CR12               | <i>Mn-B*<sup>nov017</sup></i> | FJ875225                 | PT010, PT019             |
| <i>Mf-E*<sup>nov009</sup></i> | GQ153348                 | CR352, CR403             | <i>Mm-B*<sup>nov017</sup></i> | GQ153380                 | LP03, LP10               | <i>Mn-B*<sup>nov018</sup></i> | GQ153473                 | PT020, PT027             |
| <i>Mf-E*<sup>nov010</sup></i> | GQ153349                 | CY0161, CY0165           | <i>Mm-B*<sup>nov018</sup></i> | GQ153381                 | CR51, NM39               | <i>Mn-B*<sup>nov019</sup></i> | FJ875226                 | PT019, PT020             |
| <i>Mf-E*<sup>nov011</sup></i> | GQ153350                 | CR352, CR403             | <i>Mm-B*<sup>nov019</sup></i> | GQ153382                 | LP03, CR45               | <i>Mn-B*<sup>nov020</sup></i> | GQ153474                 | PT020, PT023             |
|                               |                          |                          | <i>Mm-B*<sup>nov020</sup></i> | GQ153383                 | LP24, CR45               | <i>Mn-B*<sup>nov021</sup></i> | GQ153475                 | PT020, PT026             |
|                               |                          |                          | <i>Mm-B*<sup>nov021</sup></i> | GQ153384                 | PJ02, CR08               | <i>Mn-B*<sup>nov022</sup></i> | GQ153476                 | PT020, PT026             |
|                               |                          |                          | <i>Mm-B*<sup>nov022</sup></i> | GQ153385                 | CR08, NM43               | <i>Mn-B*<sup>nov023</sup></i> | GQ153477                 | PT020, PT025             |
|                               |                          |                          | <i>Mm-B*<sup>nov023</sup></i> | GQ153386                 | LP05, CR10               | <i>Mn-B*<sup>nov024</sup></i> | FJ875227                 | PT023                    |
|                               |                          |                          | <i>Mm-B*<sup>nov024</sup></i> | GQ153387                 | CR11                     | <i>Mn-B*<sup>nov025</sup></i> | FJ875228                 | PT023                    |
|                               |                          |                          | <i>Mm-B*<sup>nov025</sup></i> | GQ153388                 | CR11                     | <i>Mn-B*<sup>nov026</sup></i> | FJ875229                 | PT019, PT022             |
|                               |                          |                          | <i>Mm-B*<sup>nov026</sup></i> | GQ153389                 | CR48, NM42               | <i>Mn-B*<sup>nov027</sup></i> | GQ153478                 | PT023                    |
|                               |                          |                          | <i>Mm-B*<sup>nov027</sup></i> | GQ153390                 | CR068, CR48              | <i>Mn-B*<sup>nov028</sup></i> | GQ153479                 | PT023                    |
|                               |                          |                          | <i>Mm-B*<sup>nov028</sup></i> | GQ153391                 | CR48, NM35               | <i>Mn-B*<sup>nov029</sup></i> | GQ153480                 | PT022, PT023             |
|                               |                          |                          | <i>Mm-B*<sup>nov029</sup></i> | GQ153392                 | CR48, NM42               | <i>Mn-B*<sup>nov030</sup></i> | FJ875230                 | PT010, PT022             |
|                               |                          |                          | <i>Mm-B*<sup>nov030</sup></i> | GQ153393                 | CR062, CR51              | <i>Mn-B*<sup>nov031</sup></i> | FJ875231                 | PT021, PT026             |
|                               |                          |                          | <i>Mm-B*<sup>nov031</sup></i> | GQ153394                 | LP21, LP25               | <i>Mn-B*<sup>nov033</sup></i> | GQ153482                 | PT023                    |
|                               |                          |                          | <i>Mm-B*<sup>nov032</sup></i> | GQ153395                 | CR069, NM06              | <i>Mn-B*<sup>nov034</sup></i> | GQ153483                 | PT010                    |
|                               |                          |                          | <i>Mm-B*<sup>nov033</sup></i> | GQ153396                 | CR059, NM15              | <i>Mn-B*<sup>nov035</sup></i> | GQ153484                 | PT019                    |
|                               |                          |                          | <i>Mm-B*<sup>nov034</sup></i> | GQ153397                 | NM18                     | <i>Mn-B*<sup>nov036</sup></i> | FJ875232                 | PT019                    |
|                               |                          |                          | <i>Mm-B*<sup>nov035</sup></i> | GQ153398                 | PJ05, NM18               | <i>Mn-B*<sup>nov037</sup></i> | FJ875233                 | PT019                    |
|                               |                          |                          | <i>Mm-B*<sup>nov036</sup></i> | GQ153399                 | CR065, CR07              | <i>Mn-B*<sup>nov038</sup></i> | GQ153485                 | PT019                    |
|                               |                          |                          | <i>Mm-B*<sup>nov037</sup></i> | GQ153400                 | PJ02, PJ09               | <i>Mn-B*<sup>nov039</sup></i> | GQ153486                 | PT019                    |
|                               |                          |                          | <i>Mm-B*<sup>nov038</sup></i> | GQ153401                 | LP06, LP34               | <i>Mn-B*<sup>nov040</sup></i> | GQ153487                 | PT021                    |
|                               |                          |                          | <i>Mm-B*<sup>nov039</sup></i> | GQ153402                 | LP06, LP34               | <i>Mn-B*<sup>nov041</sup></i> | GQ153488                 | PT021                    |
|                               |                          |                          | <i>Mm-B*<sup>nov040</sup></i> | GQ153403                 | LP12, PJ01               | <i>Mn-B*<sup>nov042</sup></i> | GQ153489                 | PT021                    |
|                               |                          |                          | <i>Mm-B*<sup>nov041</sup></i> | GQ153404                 | LP21, PJ04               | <i>Mn-B*<sup>nov043</sup></i> | GQ153490                 | PT021                    |
|                               |                          |                          | <i>Mm-B*<sup>nov042</sup></i> | GQ153405                 | PJ06, PJ11               | <i>Mn-B*<sup>nov044</sup></i> | GQ153491                 | PT022                    |
|                               |                          |                          | <i>Mm-B*<sup>nov045</sup></i> | GQ153408                 | PJ04                     | <i>Mn-B*<sup>nov045</sup></i> | GQ153492                 | PT022                    |
|                               |                          |                          | <i>Mm-B*<sup>nov047</sup></i> | GQ153410                 | NM32                     | <i>Mn-B*<sup>nov047</sup></i> | GQ153494                 | PT024                    |
|                               |                          |                          | <i>Mm-B*<sup>nov048</sup></i> | GQ153411                 | NM32                     | <i>Mn-B*<sup>nov048</sup></i> | FJ875234                 | PT024                    |
|                               |                          |                          | <i>Mm-B*<sup>nov050</sup></i> | GQ153412                 | NM39                     | <i>Mn-B*<sup>nov049</sup></i> | GQ153495                 | PT024                    |
|                               |                          |                          | <i>Mm-B*<sup>nov051</sup></i> | GQ153413                 | NM41                     | <i>Mn-B*<sup>nov050</sup></i> | FJ875235                 | PT026                    |
|                               |                          |                          | <i>Mm-B*<sup>nov052</sup></i> | GQ153414                 | NM39                     | <i>Mn-B*<sup>nov052</sup></i> | FJ875237                 | PT026                    |
|                               |                          |                          | <i>Mm-B*<sup>nov053</sup></i> | GQ153415                 | NM41                     | <i>Mn-B*<sup>nov053</sup></i> | FJ875238                 | PT026                    |
|                               |                          |                          | <i>Mm-B*<sup>nov054</sup></i> | GQ153416                 | NM42                     | <i>Mn-B*<sup>nov054</sup></i> | FJ875239                 | PT026                    |
|                               |                          |                          | <i>Mm-B*<sup>nov055</sup></i> | GQ153417                 | NM43                     | <i>Mn-B*<sup>nov055</sup></i> | GQ153496                 | PT026                    |
|                               |                          |                          | <i>Mm-B*<sup>nov056</sup></i> | GQ153418                 | CR03                     | <i>Mn-B*<sup>nov056</sup></i> | FJ875240                 | PT028                    |
|                               |                          |                          | <i>Mm-B*<sup>nov057</sup></i> | GQ153419                 | CR055                    | <i>Mn-B*<sup>nov057</sup></i> | GQ153497                 | PT028                    |
|                               |                          |                          | <i>Mm-B*<sup>nov058</sup></i> | GQ153420                 | CR06, CR08               | <i>Mn-B*<sup>nov058</sup></i> | GQ153498                 | PT028                    |
|                               |                          |                          | <i>Mm-B*<sup>nov059</sup></i> | GQ153421                 | CR068                    | <i>Mn-B*<sup>nov059</sup></i> | FJ875241                 | PT010, PT022             |
|                               |                          |                          | <i>Mm-B*<sup>nov060</sup></i> | GQ153422                 | CR068                    | <i>Mn-B*<sup>nov060</sup></i> | GQ153499                 | PT010, PT022             |
|                               |                          |                          | <i>Mm-B*<sup>nov061</sup></i> | GQ153423                 | NM36, NM44               | <i>Mn-B*<sup>nov061</sup></i> | FJ875242                 | PT010, PT019             |
|                               |                          |                          | <i>Mm-B*<sup>nov062</sup></i> | GQ153424                 | CR12, NM35               | <i>Mn-B*<sup>nov063</sup></i> | FJ875244                 | PT010                    |
|                               |                          |                          | <i>Mm-B*<sup>nov063</sup></i> | GQ153425                 | CR060, CR067             | <i>Mn-B*<sup>nov064</sup></i> | FJ875245                 | PT010, PT027             |
|                               |                          |                          | <i>Mm-B*<sup>nov064</sup></i> | GQ153426                 | LP30, CR062              | <i>Mn-B*<sup>nov065</sup></i> | GQ153500                 | PT010                    |
|                               |                          |                          | <i>Mm-B*<sup>nov065</sup></i> | GQ153427                 | NM32                     | <i>Mn-B*<sup>nov066</sup></i> | FJ875246                 | PT019                    |
|                               |                          |                          | <i>Mm-B*<sup>nov066</sup></i> | GQ153428                 | NM36, NM44               | <i>Mn-B*<sup>nov067</sup></i> | GQ153501                 | PT019                    |
|                               |                          |                          | <i>Mm-B*<sup>nov067</sup></i> | GQ153429                 | NM36, NM44               | <i>Mn-B*<sup>nov068</sup></i> | GQ153502                 | PT019                    |
|                               |                          |                          | <i>Mm-B*<sup>nov068</sup></i> | GQ153430                 | NM36, NM44               | <i>Mn-B*<sup>nov069</sup></i> | GQ153503                 | PT021, PT022             |
|                               |                          |                          | <i>Mm-B*<sup>nov069</sup></i> | GQ153431                 | NM36, NM44               | <i>Mn-B*<sup>nov070</sup></i> | GQ153504                 | PT021, PT022             |
|                               |                          |                          | <i>Mm-B*<sup>nov070</sup></i> | GQ153432                 | NM39                     | <i>Mn-B*<sup>nov071</sup></i> | FJ875247                 | PT021, PT022             |
|                               |                          |                          | <i>Mm-B*<sup>nov071</sup></i> | GQ153433                 | NM39                     | <i>Mn-B*<sup>nov073</sup></i> | GQ153505                 | PT021, PT024             |
|                               |                          |                          | <i>Mm-B*<sup>nov072</sup></i> | GQ153434                 | CR06, NM41               | <i>Mn-B*<sup>nov074</sup></i> | GQ153506                 | PT021, PT024             |
|                               |                          |                          | <i>Mm-B*<sup>nov073</sup></i> | GQ153435                 | CR06, NM41               | <i>Mn-B*<sup>nov075</sup></i> | GQ153507                 | PT021, PT028             |
|                               |                          |                          | <i>Mm-B*<sup>nov074</sup></i> | GQ153436                 | CR05, NM35               | <i>Mn-B*<sup>nov076</sup></i> | GQ153508                 | PT021, PT024             |
|                               |                          |                          | <i>Mm-B*<sup>nov075</sup></i> | GQ153437                 | NM39, NM41               | <i>Mn-B*<sup>nov077</sup></i> | GQ153509                 | PT024                    |
|                               |                          |                          |                               |                          |                          | <i>Mn-B*<sup>nov078</sup></i> | GQ153510                 | PT024, PT027             |
|                               |                          |                          | <i>Mm-I*<sup>nov001</sup></i> | GQ153448                 | CR48                     | <i>Mn-B*<sup>nov079</sup></i> | GQ153511                 | PT025, PT027             |
|                               |                          |                          | <i>Mm-I*<sup>nov002</sup></i> | GQ153449                 | NM31                     | <i>Mn-B*<sup>nov080</sup></i> | GQ153512                 | PT025, PT027             |
|                               |                          |                          | <i>Mm-I*<sup>nov003</sup></i> | GQ153450                 | LP33, NM43               | <i>Mn-B*<sup>nov081</sup></i> | FJ875249                 | PT025, PT027             |
|                               |                          |                          | <i>Mm-I*<sup>nov004</sup></i> | GQ153451                 | LP05, CR068              | <i>Mn-B*<sup>nov083</sup></i> | FJ875250                 | PT026                    |
|                               |                          |                          |                               |                          |                          | <i>Mn-B*<sup>nov084</sup></i> | GQ153513                 | PT028                    |
|                               |                          |                          | <i>Mm-E*<sup>nov001</sup></i> | GQ153438                 | CR45, NM35               | <i>Mn-B*<sup>nov085</sup></i> | GQ153514                 | PT019                    |
|                               |                          |                          | <i>Mm-E*<sup>nov002</sup></i> | GQ153439                 | CR48, NM35               | <i>Mn-B*<sup>nov086</sup></i> | GQ153515                 | PT025                    |
|                               |                          |                          | <i>Mm-E*<sup>nov003</sup></i> | GQ153440                 | LP10, PJ07               | <i>Mn-B*<sup>nov087</sup></i> | GQ153516                 | PT025                    |
|                               |                          |                          | <i>Mm-E*<sup>nov004</sup></i> | GQ153441                 | PJ11, CR10               | <i>Mn-B*<sup>nov088</sup></i> | GQ153517                 | PT026                    |
|                               |                          |                          | <i>Mm-E*<sup>nov005</sup></i> | GQ153442                 | CR08, NM37               | <i>Mn-B*<sup>nov089</sup></i> | GQ153518                 | PT024, PT026             |
|                               |                          |                          | <i>Mm-E*<sup>nov006</sup></i> | GQ153443                 | CR48, NM42               | <i>Mn-B*<sup>nov090</sup></i> | FJ875251                 | PT026, PT028             |
|                               |                          |                          | <i>Mm-E*<sup>nov007</sup></i> | GQ153444                 | LP11, LP15               |                               |                          |                          |
|                               |                          |                          | <i>Mm-E*<sup>nov008</sup></i> | GQ153445                 | NM31                     | <i>Mn-I*<sup>nov002</sup></i> | GQ153527                 | PT021                    |
|                               |                          |                          | <i>Mm-E*<sup>nov009</sup></i> | GQ153446                 | NM41                     |                               |                          |                          |
|                               |                          |                          | <i>Mm-E*<sup>nov010</sup></i> | GQ153447                 | NM41                     | <i>Mn-E*<sup>nov001</sup></i> | GQ153519                 | PT009, PT010             |
|                               |                          |                          |                               |                          |                          | <i>Mn-E*<sup>nov003</sup></i> | GQ153520                 | PT023, PT026             |
|                               |                          |                          |                               |                          |                          | <i>Mn-E*<sup>nov004</sup></i> | GQ153521                 | PT019                    |
|                               |                          |                          |                               |                          |                          | <i>Mn-E*<sup>nov005</sup></i> | GQ153522                 | PT022                    |
|                               |                          |                          |                               |                          |                          | <i>Mn-E*<sup>nov006</sup></i> | GQ153523                 | PT024                    |
|                               |                          |                          |                               |                          |                          | <i>Mn-E*<sup>nov007</sup></i> | GQ153524                 | PT027                    |
|                               |                          |                          |                               |                          |                          | <i>Mn-E*<sup>nov008</sup></i> | GQ153525                 | PT010, PT019             |
|                               |                          |                          |                               |                          |                          | <i>Mn-E*<sup>nov009</sup></i> | GQ153526                 | PT021, PT028             |

Supplementary Figure 1. Novel cynomolgus, rhesus and pig-tailed macaque MHC class I sequences.

GeneBank accession numbers as well as representative animals in which we observed these sequences are listed.

## Supplementary Figure 2.

| Allele/Animal ID        | CY0157 | CY0161 | CY0165 | CR354 | CR352 | CR403 | CR355 | CR340 | AG108 | AG102 | AG109 | AG107 | 112003 | Total # Reads in Contigs |
|-------------------------|--------|--------|--------|-------|-------|-------|-------|-------|-------|-------|-------|-------|--------|--------------------------|
| # Total Reads/Animal    | 11754  | 7689   | 7955   | 7582  | 10183 | 7441  | 10803 | 6392  | 10169 | 9733  | 10374 | 11928 | 21.3   | Ave Alleles/Animal       |
| # Alleles / Animal      | 14     | 13     | 13     | 12    | 12    | 28    | 24    | 21    | 23    | 27    | 27    | 25    |        |                          |
| Mafa Haplotype 1        | M1     | M2     | M3     | M4    | M1    | M1    | M1    | M4    | M1    | M4/M6 | M2    | M2    |        |                          |
| Mafa Haplotype 2        | Homo   | Homo   | Homo   | Homo  | M6    | M6    | M7    | M7    | M2    | Fi    | Fi    | M4/M6 |        |                          |
| <b>Mafa-A Sequences</b> |        |        |        |       |       |       |       |       |       |       |       |       |        |                          |
| Mafa-AI*03101           |        |        |        | 23.7  |       |       |       | 16.5  |       | 8.2   |       | 11.1  |        | 4                        |
| Mafa-AI*03201           |        |        |        |       | 12.8  | 12.6  |       |       |       |       |       |       |        | 2                        |
| Mafa-AI*04701           |        |        |        |       | 7.3   | 7.5   |       |       |       |       |       |       |        | 2                        |
| Mafa-AI*06001/02/03     |        |        |        |       |       |       | 20.0  | 17.4  |       |       |       |       |        | 2                        |
| Mafa-AI*06301/02        | 20.9   | 23.0   | 27.7   |       | 9.5   | 8.2   | 10.1  |       | 21.2  |       | 7.8   | 14.1  |        | 9                        |
| Mafa-A2*05g             | 0.3    | 0.5    | 0.7    | 1.0   | 0.2   | 0.2   | 0.1   | 0.4   | 0.6   | 0.4   | 0.2   | 0.4   |        | 12                       |
| Mafa-A2*2402            |        |        |        |       |       |       |       |       |       | 9.4   | 10.3  |       |        | 2                        |
| Mafa-A4*0101            | 4.9    | 6.1    | 8.7    |       | 4.7   | 6.4   | 4.0   |       | 5.6   |       | 2.9   | 3.4   |        | 9                        |
| Mafa-A5*3001            |        |        |        | 2.7   |       |       | 1.0   | 2.4   |       |       | 0.7   | 0.4   |        | 5                        |
| Mf-A*mov001             |        |        |        |       |       |       |       |       |       | 4.1   | 6.5   |       |        | 2                        |
| <b>Mafa-B Sequences</b> |        |        |        |       |       |       |       |       |       |       |       |       |        |                          |
| Mafa-B*02702            | 12.8   |        |        |       | 7.5   | 6.2   | 8.3   |       | 5.5   |       |       |       |        | 5                        |
| Mafa-B*03602            |        |        |        |       |       |       |       |       |       | 10.6  | 10.5  |       |        | 2                        |
| Mafa-B*0430101          | 3.2    |        |        |       | 1.8   | 1.2   | 1.9   |       | 1.1   |       |       |       |        | 5                        |
| Mafa-B*0440101          | 27.9   |        |        |       | 12.3  | 13.9  | 14.3  |       | 14.0  |       |       |       |        | 5                        |
| Mafa-B*04501            |        |        | 2.4    |       |       |       |       |       |       |       |       |       |        | 1                        |
| Mafa-B*0460101          | 7.2    |        |        |       | 3.3   | 3.2   | 3.7   |       | 4.0   |       |       |       |        | 5                        |
| Mafa-B*0470101          |        |        |        | 18.5  |       |       |       | 17.6  |       |       |       |       |        | 2                        |
| Mafa-B*0480101          |        | 12.5   |        |       |       |       |       |       | 5.7   |       | 3.7   | 5.5   |        | 4                        |
| Mafa-B*0490101          |        |        |        |       | 7.8   | 8.6   |       |       |       | 8.3   |       | 9.6   |        | 4                        |
| Mafa-B*05101            |        |        | 27.3   |       |       |       |       |       |       |       |       |       |        | 1                        |
| Mafa-B*05401            | 3.7    |        |        |       | 2.2   | 1.9   | 1.3   |       | 1.9   |       |       |       |        | 5                        |
| Mafa-B*05501/01/02      | 1.4    |        |        |       | 0.6   | 0.5   | 0.7   |       | 0.4   | 0.2   |       |       |        | 7                        |
| Mafa-B*05504            |        |        |        |       | 0.5   | 0.4   |       |       |       | 0.2   |       |       |        | 4                        |
| Mafa-B*0600101          |        | 18.1   |        |       |       |       |       |       | 6.7   |       | 6.7   | 7.5   |        | 4                        |
| Mafa-B*0620101          |        |        | 0.2    |       |       |       |       | 0.5   |       |       |       |       |        | 2                        |
| Mafa-B*0630101          |        | 21.4   |        |       |       |       |       |       | 10.8  |       | 11.4  | 13.8  |        | 4                        |
| Mafa-B*0640101          |        |        |        |       | 3.2   | 3.1   |       |       |       | 3.9   |       | 4.2   |        | 4                        |
| Mafa-B*0650101          |        |        |        |       | 3.6   | 3.6   |       |       |       | 2.1   |       | 2.9   |        | 4                        |
| Mafa-B*0660101          |        | 0.3    |        |       |       |       |       |       | 0.1   |       | 0.1   | 0.3   |        | 4                        |
| Mafa-B*07701/02         |        |        |        |       | 3.9   | 3.3   |       |       |       |       | 6.8   | 2.6   | 5.6    | 5                        |
| Mafa-B*08101            |        |        |        |       |       |       |       |       |       | 7.3   | 6.4   |       |        | 2                        |
| Mafa-B*08201            |        |        |        |       |       |       |       |       |       | 4.3   | 7.5   |       |        | 2                        |
| Mafa-B*08401            |        |        |        |       |       |       |       |       |       | 0.8   | 0.4   |       |        | 2                        |
| Mafa-B*0860101/02       |        |        |        |       |       |       |       |       |       | 3.6   | 1.7   |       |        | 2                        |
| Mafa-B*09001            |        |        |        |       |       |       | 0.8   | 0.8   |       |       |       |       |        | 2                        |
| Mafa-B*09301            |        | 2.4    | 6.2    |       |       |       |       |       | 0.4   |       | 0.9   | 1.1   |        | 5                        |
| Mafa-B*09401/02         |        |        |        | 15.8  |       |       |       | 3.1   |       |       |       |       |        | 2                        |
| Mafa-B*09502            |        |        |        |       |       |       | 4.5   | 6.7   |       |       |       |       |        | 2                        |
| Mf-B*mov001             | 2.2    |        |        |       | 1.5   | 1.6   | 1.2   |       | 0.2   |       |       |       |        | 5                        |
| Mf-B*mov002             | 0.9    |        |        |       | 0.4   | 1.0   | 0.7   |       | 0.2   |       |       |       |        | 5                        |
| Mf-B*mov003             | 0.5    |        |        | 1.1   | 0.4   | 0.4   | 0.4   | 1.0   |       |       |       |       |        | 6                        |
| Mf-B*mov004             |        | 0.7    |        |       |       |       |       |       | 0.2   |       | 0.2   | 0.3   |        | 4                        |
| Mf-B*mov005             |        | 0.5    |        |       |       |       |       |       | 0.1   |       |       | 0.04  |        | 3                        |
| Mf-B*mov006             |        |        | 0.6    |       |       |       |       |       |       |       |       |       |        | 1                        |
| Mf-B*mov007             |        |        | 0.5    |       |       |       |       |       |       |       |       |       |        | 1                        |
| Mf-B*mov008             |        |        | 0.3    |       |       |       |       |       |       |       |       |       |        | 1                        |
| Mf-B*mov010             |        |        |        | 0.2   |       |       |       | 0.1   |       |       |       |       |        | 2                        |
| Mf-B*mov011             |        |        |        |       | 2.1   | 1.8   |       |       |       | 1.7   |       | 2.2   |        | 4                        |
| Mf-B*mov012             |        |        |        |       | 0.4   | 0.6   |       |       |       | 0.4   |       | 0.4   |        | 4                        |
| Mf-B*mov014             |        |        |        |       | 0.1   | 0.2   |       |       |       | 0.2   |       |       |        | 3                        |
| Mf-B*mov015             |        |        |        |       |       |       | 10.5  | 13.3  |       |       |       |       |        | 2                        |
| Mf-B*mov017             |        |        |        |       |       |       | 0.3   | 0.3   |       |       |       |       |        | 2                        |
| Mf-B*mov018             |        |        |        | 0.5   |       |       |       | 0.2   |       |       |       |       |        | 2                        |
| Mf-B*mov019             |        |        |        |       |       |       | 0.1   | 0.2   |       |       |       |       |        | 2                        |
| Mf-B*mov020             |        |        |        |       |       |       |       |       |       | 6.9   | 5.6   |       |        | 2                        |
| Mf-B*mov021             |        |        |        |       |       |       |       |       |       | 0.9   | 0.4   |       |        | 2                        |
| Mf-B*mov022             |        |        |        |       |       |       |       |       |       | 0.4   | 0.2   |       |        | 2                        |
| <b>Mafa-I Sequences</b> |        |        |        |       |       |       |       |       |       |       |       |       |        |                          |
| Mafa-I*g                |        |        | 1.5    |       | 0.7   | 1.0   | 0.5   | 0.6   |       | 2.4   | 1.7   | 0.4   |        | 8                        |
| Mafa-I*110101           |        |        |        | 9.8   |       |       |       | 3.7   |       |       |       |       |        | 2                        |
| <b>Mafa-E Sequences</b> |        |        |        |       |       |       |       |       |       |       |       |       |        |                          |
| Mafa-E*01/02            | 13.2   |        |        | 24.2  | 6.5   | 5.6   | 8.1   | 8.1   | 10.4  | 8.4   |       | 7.8   |        | 9                        |
| Mf-E*mov001             |        | 13.5   | 22.7   |       |       |       |       |       | 9.6   |       | 6.5   | 7.4   |        | 5                        |
| Mf-E*mov002             |        |        |        |       | 6.0   | 5.9   |       |       |       | 6.2   | 4.9   |       |        | 4                        |
| Mf-E*mov003             |        |        |        |       |       |       | 6.5   | 5.8   |       |       |       |       |        | 2                        |
| Mf-E*mov004             |        |        |        | 2.1   |       |       |       | 0.7   |       | 0.6   |       | 0.9   |        | 4                        |
| Mf-E*mov005             | 0.8    |        |        |       | 0.3   | 0.3   | 0.6   |       | 0.7   |       |       |       |        | 5                        |
| Mf-E*mov006             |        | 0.6    | 1.1    |       |       |       |       |       | 0.2   |       | 0.3   | 0.2   |        | 5                        |
| Mf-E*mov007             |        |        |        |       |       |       |       |       |       | 0.6   | 0.3   |       |        | 2                        |
| Mf-E*mov008             |        |        |        |       |       |       | 0.5   | 0.4   |       |       |       |       |        | 2                        |
| Mf-E*mov009             |        |        |        |       | 0.3   | 0.3   |       |       |       |       |       |       |        | 2                        |
| Mf-E*mov010             |        | 0.3    | 0.2    |       |       |       |       |       | 0.1   |       | 0.1   | 0.2   |        | 5                        |
| Mf-E*mov011             |        |        |        |       | 0.1   | 0.3   |       |       |       |       |       |       |        | 2                        |

Supplementary Figure 2. MHC class I genotypes of cynomolgus macaques.

Transcript abundance levels are presented as a percentage of the total MHC class I sequences reads evaluated for each animal.

# Supplementary Figure 3.

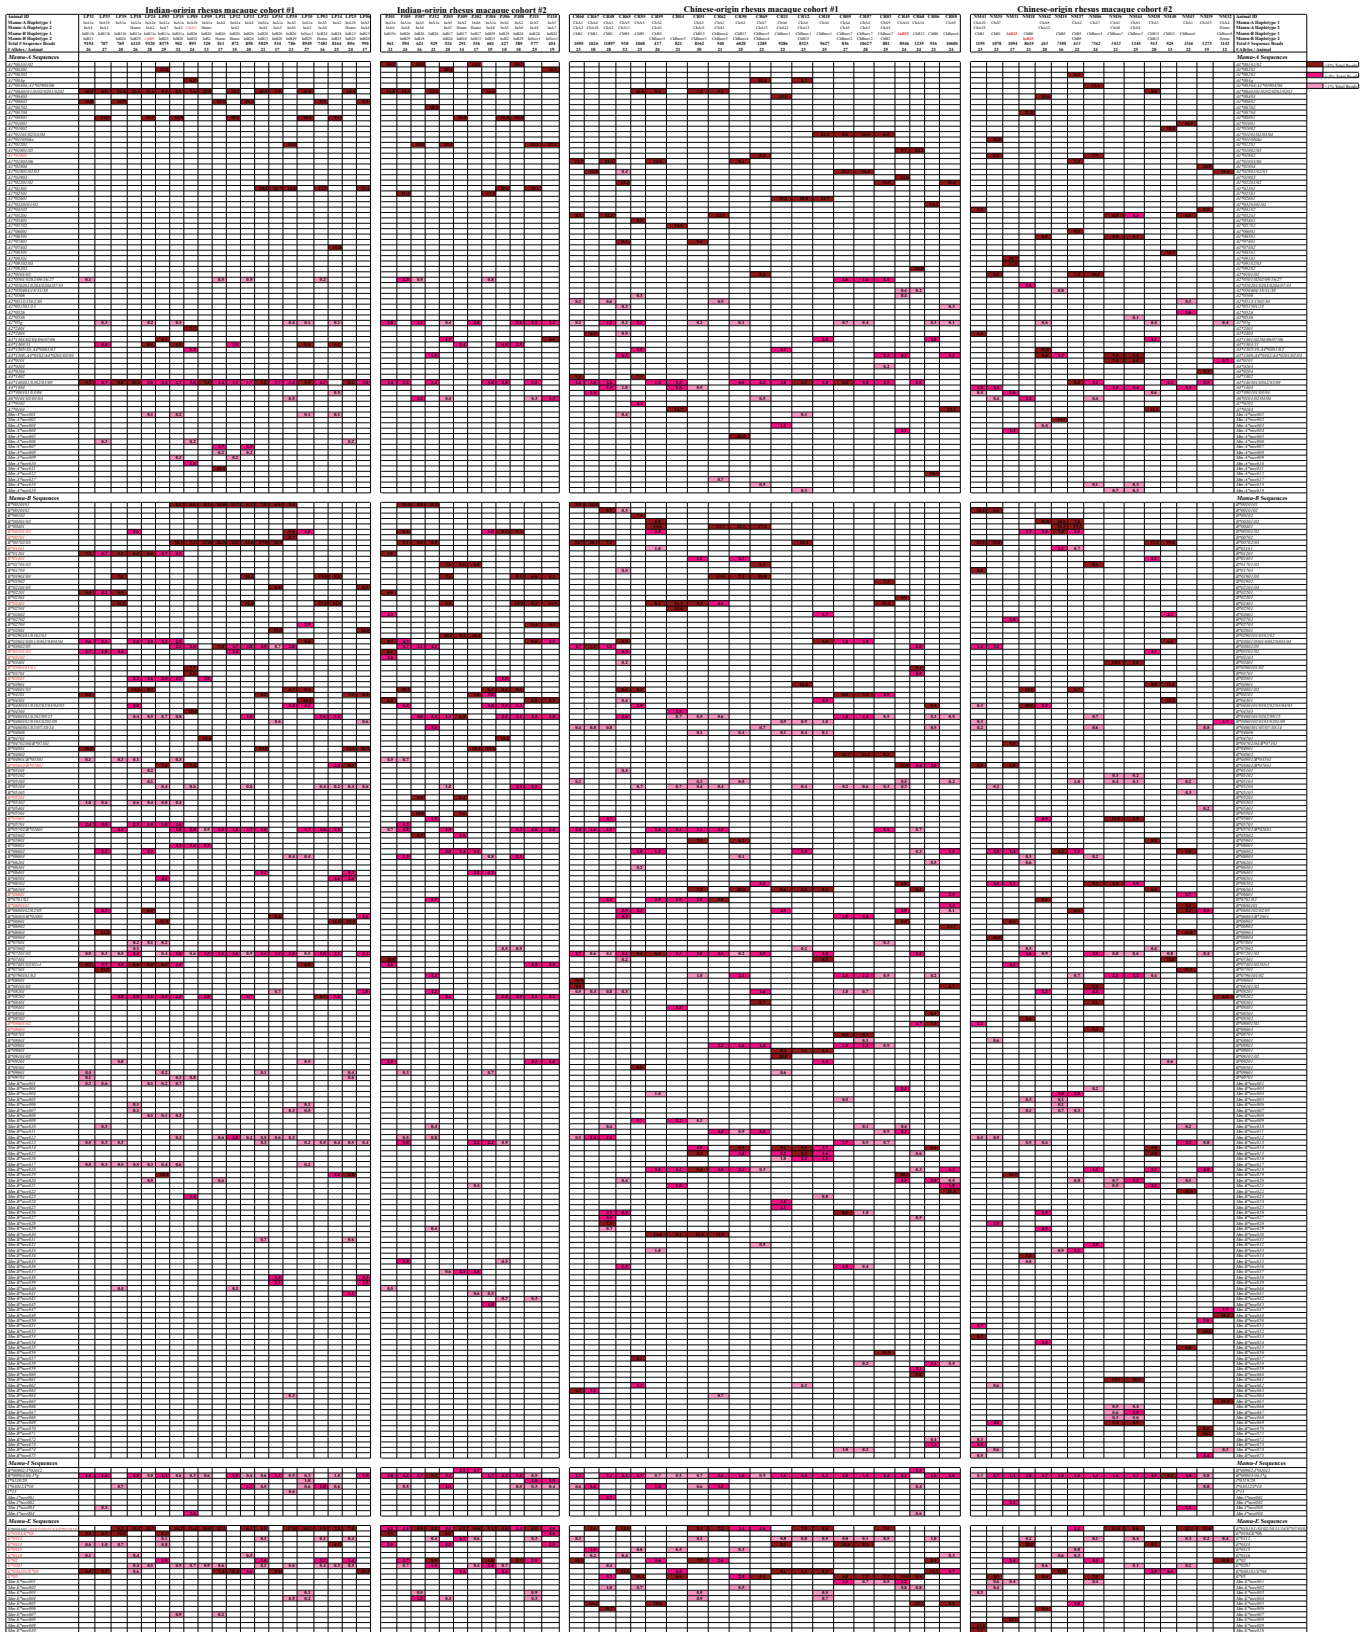

**Supplementary Figure 3.** MHC class I genotypes of rhesus macaques.

Transcript abundance levels are presented as a percentage of the total MHC class I sequences reads evaluated for each animals. Class I sequence names with primer mismatches are highlighted in red in the left column.

Supplementary Figure 4.

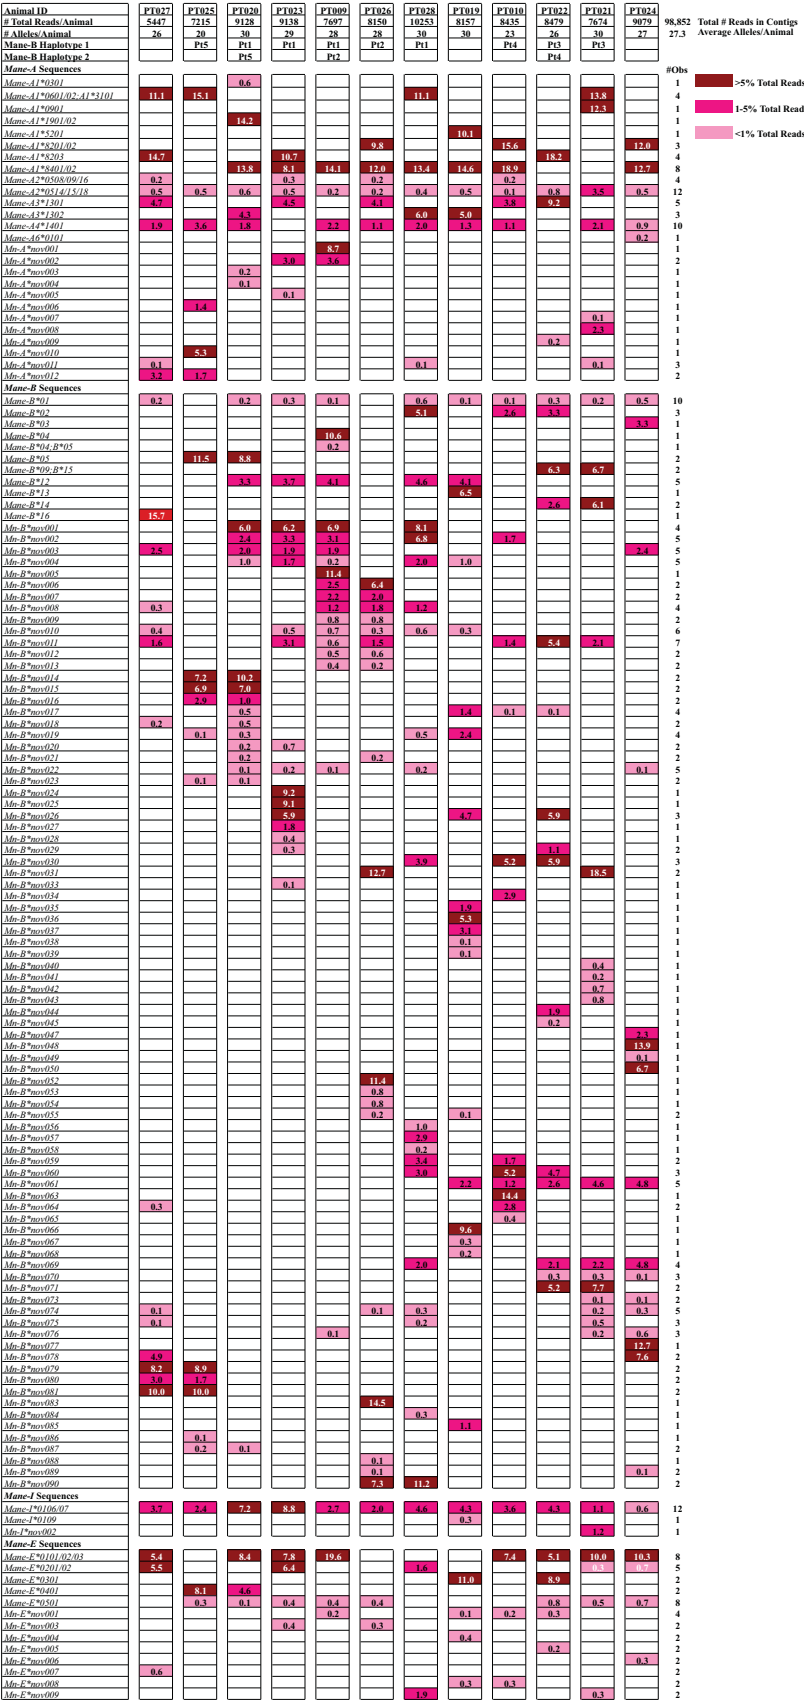

## Supplementary Figure 5.

| Animal ID             | MID Tag | Total Reads    | Failed Assembly | Assembled      | Known or Novel | Insertions/ Deletions | Single Base Substitutions | Multiple Base Substitutions |
|-----------------------|---------|----------------|-----------------|----------------|----------------|-----------------------|---------------------------|-----------------------------|
| <b>Overall Totals</b> |         | <b>484,985</b> | <b>73,114</b>   | <b>411,871</b> | <b>406,274</b> | <b>2,914</b>          | <b>565</b>                | <b>2,118</b>                |
| <b>Pilot Study</b>    |         |                |                 |                |                |                       |                           |                             |
| <b>Totals</b>         |         | <b>444,142</b> | <b>68,173</b>   | <b>375,969</b> | <b>371,104</b> | <b>2,703</b>          | <b>278</b>                | <b>1,884</b>                |
| CY0157                | MID1    | 12,564         | 591             | 11,973         | 11,740         | 202                   | 7                         | 24                          |
| CY0161                | MID2    | 8,839          | 979             | 7,860          | 7,682          | 97                    | 14                        | 67                          |
| CY0165                | MID3    | 10,307         | 2,070           | 8,237          | 7,961          | 136                   | 5                         | 135                         |
| CR354                 | MID4    | 11,898         | 3,981           | 7,917          | 7,570          | 260                   | 5                         | 82                          |
| CR403                 | MID5    | 8,265          | 601             | 7,664          | 7,446          | 62                    | 5                         | 151                         |
| CR352                 | MID6    | 11,952         | 1,617           | 10,335         | 10,193         | 92                    | 0                         | 50                          |
| CR355                 | MID7    | 12,249         | 1,366           | 10,883         | 10,779         | 91                    | 6                         | 7                           |
| CR340                 | MID8    | 9,041          | 2,518           | 6,523          | 6,371          | 152                   | 0                         | 0                           |
| AG108                 | MID9    | 14,176         | 3,958           | 10,218         | 10,130         | 57                    | 10                        | 21                          |
| AG102                 | MID10   | 11,697         | 1,368           | 10,329         | 9,691          | 72                    | 6                         | 560                         |
| AG109                 | MID11   | 13,345         | 2,891           | 10,454         | 10,337         | 106                   | 5                         | 6                           |
| AG107                 | MID12   | 13,326         | 1,231           | 12,095         | 11,903         | 153                   | 0                         | 39                          |
| LP01                  | MID1    | 8,481          | 892             | 7,589          | 7,486          | 96                    | 7                         | 0                           |
| LP03                  | MID2    | 9,300          | 928             | 8,372          | 8,403          | 54                    | 0                         | 15                          |
| LP10                  | MID5    | 10,381         | 1,434           | 8,947          | 8,871          | 27                    | 41                        | 8                           |
| LP14                  | MID6    | 8,729          | 496             | 8,233          | 8,164          | 58                    | 5                         | 6                           |
| LP18                  | MID7    | 7,993          | 1,849           | 6,144          | 6,115          | 29                    | 0                         | 0                           |
| LP21                  | MID8    | 7,385          | 1,410           | 5,975          | 5,922          | 27                    | 26                        | 0                           |
| LP24                  | MID9    | 10,431         | 1,096           | 9,335          | 9,325          | 10                    | 0                         | 0                           |
| LP31                  | MID10   | 10,553         | 1,340           | 9,213          | 9,174          | 31                    | 0                         | 8                           |
| ChRh07                | MID1    | 12,485         | 1,858           | 10,627         | 10,463         | 124                   | 0                         | 40                          |
| ChRh08                | MID2    | 10,622         | 1,690           | 8,932          | 8,856          | 69                    | 0                         | 7                           |
| ChRh10                | MID3    | 10,160         | 875             | 9,285          | 9,237          | 18                    | 0                         | 30                          |
| ChRh11                | MID4    | 10,631         | 1,794           | 8,837          | 8,764          | 29                    | 0                         | 44                          |
| ChRh12                | MID5    | 8,468          | 689             | 7,779          | 7,773          | 6                     | 0                         | 0                           |
| ChRh45                | MID6    | 11,177         | 3,370           | 7,807          | 7,743          | 44                    | 8                         | 12                          |
| ChRh48                | MID7    | 12,169         | 2,106           | 10,063         | 9,997          | 48                    | 6                         | 12                          |
| ChRh50                | MID8    | 5,812          | 731             | 5,081          | 5,044          | 31                    | 0                         | 6                           |
| ChRh51                | MID9    | 8,147          | 1,149           | 6,998          | 6,954          | 29                    | 6                         | 9                           |
| NM06                  | MID10   | 8,706          | 1,308           | 7,398          | 7,362          | 36                    | 0                         | 0                           |
| NM15                  | MID11   | 9,785          | 2,203           | 7,582          | 7,508          | 74                    | 0                         | 0                           |
| NM18                  | MID12   | 10,288         | 2,004           | 8,284          | 8,227          | 49                    | 0                         | 8                           |
| PT020                 | MID1    | 9,944          | 775             | 9,169          | 9,122          | 6                     | 14                        | 27                          |
| PT021                 | MID2    | 8,565          | 836             | 7,729          | 7,599          | 29                    | 6                         | 95                          |
| PT022                 | MID3    | 9,777          | 1,245           | 8,532          | 8,443          | 31                    | 5                         | 53                          |
| PT023                 | MID4    | 10,165         | 972             | 9,193          | 9,088          | 45                    | 9                         | 51                          |
| PT024                 | MID5    | 10,176         | 1,060           | 9,116          | 9,012          | 52                    | 17                        | 35                          |
| PT025                 | MID6    | 8,893          | 1,663           | 7,230          | 7,201          | 14                    | 0                         | 15                          |
| PT026                 | MID7    | 8,792          | 562             | 8,230          | 8,115          | 30                    | 5                         | 80                          |
| PT027                 | MID8    | 6,101          | 624             | 5,477          | 5,407          | 33                    | 7                         | 30                          |
| PT028                 | MID9    | 11,708         | 1,720           | 9,988          | 9,870          | 25                    | 5                         | 88                          |
| PT009                 | MID10   | 10,374         | 2,639           | 7,735          | 7,662          | 35                    | 0                         | 38                          |
| PT010                 | MID11   | 10,026         | 1,732           | 8,294          | 8,254          | 17                    | 23                        | 0                           |
| PT019                 | MID12   | 10,259         | 2,052           | 8,207          | 8,140          | 17                    | 25                        | 25                          |
| <b>Follow-up</b>      |         |                |                 |                |                |                       |                           |                             |
| <b>Study Totals</b>   |         | <b>40,843</b>  | <b>4,941</b>    | <b>35,902</b>  | <b>35,170</b>  | <b>211</b>            | <b>287</b>                | <b>234</b>                  |
| ChRh03                | MID1    | 889            | 72              | 817            | 802            | 9                     | 4                         | 2                           |
| ChRh04                | MID2    | 865            | 71              | 794            | 784            | 4                     | 4                         | 2                           |
| ChRh05                | MID3    | 1,165          | 386             | 779            | 775            | 2                     | 0                         | 2                           |
| ChRh06                | MID4    | 909            | 141             | 768            | 755            | 7                     | 4                         | 2                           |
| ChRh055               | MID5    | 1,064          | 85              | 979            | 965            | 6                     | 8                         | 0                           |
| ChRh059               | MID6    | 450            | 91              | 359            | 354            | 3                     | 2                         | 0                           |
| ChRh060               | MID7    | 1,132          | 96              | 1,036          | 1,030          | 0                     | 4                         | 2                           |
| ChRh062               | MID8    | 583            | 84              | 499            | 488            | 9                     | 2                         | 0                           |
| ChRh065               | MID9    | 1,028          | 98              | 930            | 907            | 13                    | 6                         | 4                           |
| ChRh067               | MID10   | 1,263          | 319             | 944            | 925            | 7                     | 8                         | 4                           |
| ChRh068               | MID11   | 1,038          | 80              | 958            | 939            | 2                     | 5                         | 12                          |
| ChRh069               | MID12   | 1,400          | 134             | 1,266          | 1,256          | 4                     | 4                         | 2                           |
| NM31                  | MID1    | 969            | 108             | 861            | 820            | 11                    | 10                        | 20                          |
| NM32                  | MID2    | 905            | 65              | 840            | 824            | 2                     | 8                         | 6                           |
| NM35                  | MID3    | 1,098          | 125             | 973            | 918            | 15                    | 17                        | 23                          |
| NM36                  | MID4    | 1,118          | 94              | 1,024          | 1,012          | 10                    | 0                         | 2                           |
| NM37                  | MID5    | 685            | 60              | 625            | 609            | 2                     | 8                         | 6                           |
| NM38                  | MID6    | 582            | 98              | 484            | 471            | 9                     | 4                         | 0                           |
| NM39                  | MID7    | 1,031          | 87              | 944            | 931            | 2                     | 6                         | 5                           |
| NM40                  | MID8    | 586            | 57              | 529            | 525            | 0                     | 2                         | 2                           |
| NM41                  | MID9    | 1,185          | 138             | 1,047          | 990            | 6                     | 19                        | 32                          |
| NM42                  | MID10   | 759            | 274             | 485            | 465            | 0                     | 13                        | 7                           |
| NM43                  | MID11   | 1,341          | 138             | 1,203          | 1,176          | 12                    | 6                         | 9                           |
| NM44                  | MID12   | 1,231          | 112             | 1,119          | 1,080          | 6                     | 28                        | 5                           |
| LP33                  | MID1    | 813            | 89              | 724            | 707            | 9                     | 4                         | 4                           |
| LP35                  | MID2    | 900            | 109             | 791            | 789            | 6                     | 12                        | 4                           |
| LP06                  | MID3    | 1,159          | 157             | 1,002          | 990            | 4                     | 4                         | 4                           |
| LP15                  | MID4    | 1,071          | 143             | 928            | 898            | 2                     | 16                        | 12                          |
| LP05                  | MID5    | 1,075          | 170             | 905            | 886            | 3                     | 14                        | 2                           |
| LP09                  | MID6    | 413            | 93              | 320            | 320            | 0                     | 0                         | 0                           |
| LP30                  | MID7    | 903            | 88              | 815            | 787            | 0                     | 7                         | 21                          |
| LP34                  | MID8    | 604            | 87              | 517            | 513            | 0                     | 4                         | 0                           |
| LP11                  | MID9    | 910            | 87              | 823            | 813            | 6                     | 2                         | 2                           |
| LP12                  | MID10   | 1,125          | 231             | 894            | 872            | 7                     | 7                         | 8                           |
| LP13                  | MID11   | 992            | 123             | 869            | 858            | 3                     | 6                         | 2                           |
| LP25                  | MID12   | 975            | 98              | 877            | 856            | 11                    | 6                         | 4                           |
| PJ01                  | MID1    | 589            | 20              | 569            | 563            | 0                     | 0                         | 6                           |
| PJ02                  | MID2    | 576            | 30              | 546            | 538            | 0                     | 8                         | 0                           |
| PJ03                  | MID3    | 571            | 39              | 532            | 524            | 4                     | 2                         | 2                           |
| PJ04                  | MID4    | 646            | 39              | 607            | 601            | 2                     | 4                         | 0                           |
| PJ05                  | MID5    | 627            | 28              | 599            | 594            | 2                     | 3                         | 0                           |
| PJ06                  | MID6    | 467            | 36              | 431            | 427            | 0                     | 4                         | 0                           |
| PJ07                  | MID7    | 658            | 26              | 632            | 621            | 7                     | 2                         | 2                           |
| PJ08                  | MID8    | 423            | 34              | 389            | 385            | 0                     | 0                         | 4                           |
| PJ09                  | MID9    | 331            | 36              | 295            | 291            | 0                     | 2                         | 2                           |
| PJ10                  | MID10   | 547            | 91              | 456            | 452            | 2                     | 2                         | 0                           |
| PJ11                  | MID11   | 619            | 34              | 585            | 575            | 0                     | 4                         | 6                           |
| PJ12                  | MID12   | 573            | 40              | 533            | 529            | 2                     | 2                         | 0                           |

## Supplementary Figure 5. Detailed analysis of sequence artifacts.

The total number of high quality reads obtained for each animal are given along with the number of reads that assembled (contigs of 5 or more for the pilot study and 2 or more for the follow-up study) vs. the number that failed to assemble. Sequence reads that passed our assembly filter were evaluated further by BLASTN analysis and broken down into known or novel MHC class I sequences and various types of sequence artifacts.



## Supplementary Figure 6.

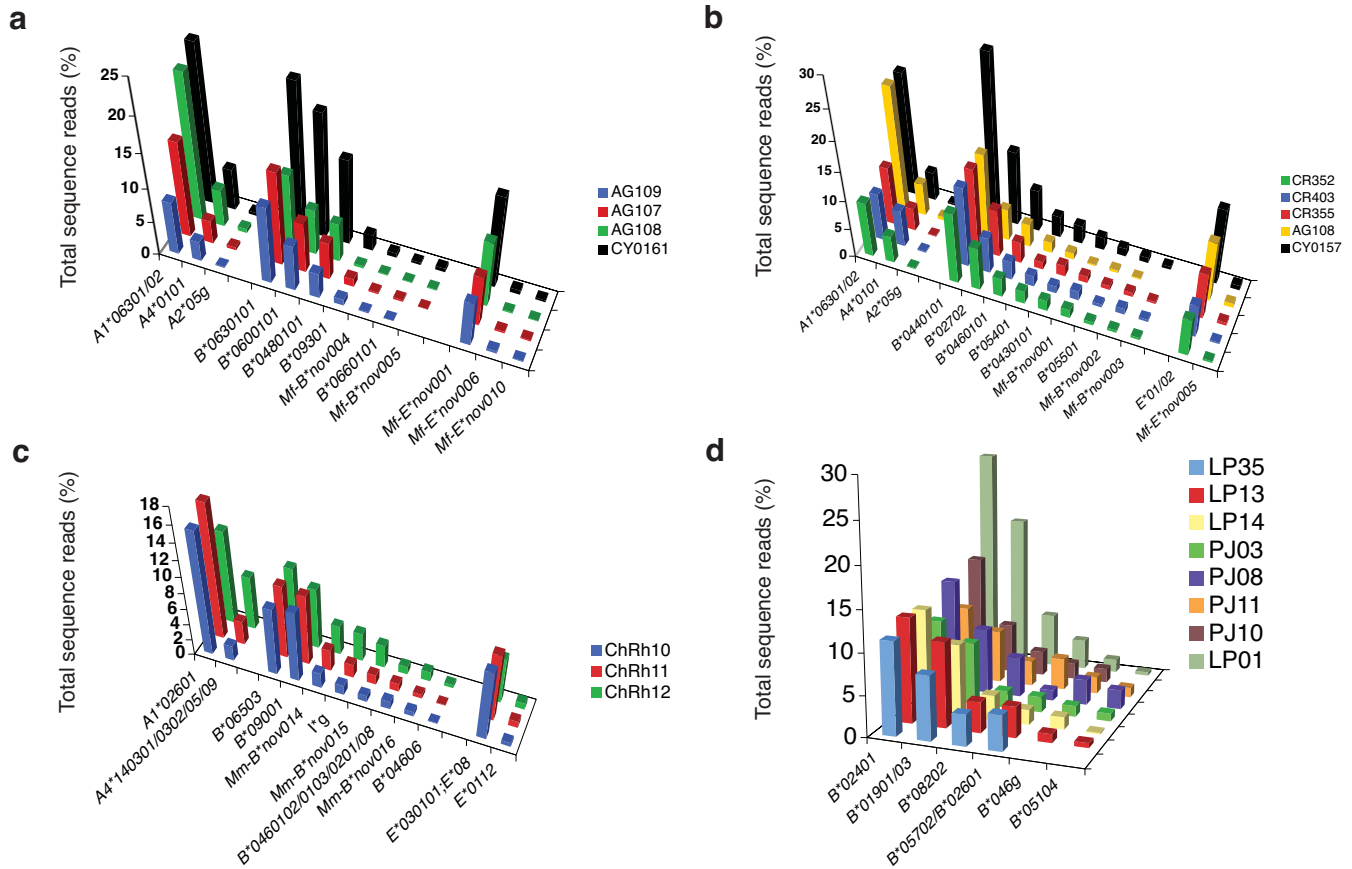

### Supplementary Figure 6. Additional shared MHC class I transcript abundance profiles.

**a.** Transcript profiles for four Mauritian cynomolgus macaques that share the M2 haplotype<sup>7</sup>. Transcript levels are approximately twice as great for CY0161 since this animal is homozygous for the M2 haplotype while the remaining animals are heterozygous (see **Fig 3a** for the alternate haplotypes of these animals). Mf-B\* nov005 was detected as 42, 15 and five sequence reads in CY0161, AG108 and AG107, respectively but fell below our detection limit of five sequence reads for AG109. **b.** Transcript profiles for four Mauritian cynomolgus macaques that share the most frequent M1 haplotype<sup>7</sup>. Transcript levels are approximately twice as great for CY0157 since this animal is homozygous for the M1 haplotype while the remaining animals are M1 heterozygotes (**Supplementary Fig. 2** online). This figure only includes class I sequences associated with the M1 haplotype. **c.** Transcript profiles for three Chinese rhesus macaques that share the novel ChBnov1 haplotype (**Supplementary Fig. 7** online). Once again, only sequences from the shared haplotype are illustrated for these heterozygous animals. **d.** Transcript profiles for eight Indian rhesus macaques that share the common InB24 haplotype<sup>5, 6</sup> (**Supplementary Fig. 7** online). LP01 is homozygous for this Mamu-B haplotype and displays transcript levels approximately twice those of the remaining heterozygous animals. For simplicity, only Mamu-B sequences associated with the InB24 haplotype are presented.

## Supplementary Figure 7.

Haplotype # Obs Mamu-A sequences

Indian rhesus chromosomes (n = 64)

|       |    |                                                                      |
|-------|----|----------------------------------------------------------------------|
| InA1a | 17 | A1*0040101/0102/0201/0202, A4*140301/0302/05/09                      |
| InA1b | 4  | A1*0040101/0102/0201/0202, A4*140301/0302/05/09, Mm-A* <i>nov006</i> |
| InA2  | 9  | A1*00801, A3*1303/11, {A2*05g}, {A4*140301/0302/05/09}               |
| InA3  | 7  | A1*02301, A4*140301/0302/05/09                                       |
| InA4  | 6  | A1*00602, A4*140301/0302/05/09, {A2*0501/0202/09/16/27}              |
| InA5  | 5  | A1*01201, A2*05g, A6*0101/02/03/04                                   |
| InA6  | 5  | A1*00101/02, A2*05g                                                  |
| InA7  | 3  | A1*00201, A3*1301/02/04/06/07/08                                     |
| InA8  | 2  | A1*02501, A2*0501/0202/09/16/27                                      |

Chinese rhesus chromosomes (n = 72)

|        |   |                                                                |
|--------|---|----------------------------------------------------------------|
| ChA1   | 6 | A1*05201, {A2*0513/1502/30}                                    |
| ChA 2  | 5 | A1*01803/06, A4*140301/0302/05/09, {A2*05g}                    |
| ChA 3  | 5 | A1*0040101/0102/0201/0202, {A2*05g}                            |
| ChA 4  | 5 | A1*01901/02/05, A4*140301/0302/05/09, {A2*05g}                 |
| ChA 5  | 3 | A1*01101/02/03/04, A2*0501/0202/09/16/27, A4*140301/0302/05/09 |
| ChA 6  | 3 | A1*02601, A4*140301/0302/05/09                                 |
| ChA 7  | 3 | A1*01802, A2*0101/02, A6*0101/02/03/04, {Mm-A* <i>nov018</i> } |
| ChA 8  | 3 | A1*06501, A3*1308/A4*0102/A4*0201/02/03, {A2*05g}              |
| ChA 9  | 3 | A1*02201/02, A3*1308/A4*0102/A4*0201/02/03, {A2*051501/23}     |
| ChA 10 | 2 | A2*2403, {A5*300101/03/04}                                     |
| ChA 11 | 2 | A1*07401, A2*05g, A4*1404                                      |
| ChA 12 | 2 | A1*00403, A3*1305/10/A4*0301/02, Mm-A* <i>nov003</i>           |
| ChA 13 | 2 | A1*003g, A4*140301/0302/05/09                                  |
| ChA 14 | 2 | A1*01801/05, A2*050404/18/31/38                                |
| ChA 15 | 2 | A1*04102, A4*140301/0302/04/05/09                              |

Haplotype # Obs Mamu-B sequences

Indian rhesus chromosomes (n = 64)

|          |    |                                                                                                                                                                                                |
|----------|----|------------------------------------------------------------------------------------------------------------------------------------------------------------------------------------------------|
| InB26    | 14 | B*01010101, B*00702/03, {B*03002/05}, {B*02601/B*05702}, {B*07201/02}, {Mm-B* <i>nov012</i> }                                                                                                  |
| InB24    | 9  | B*01901/03, B*02401, B*05702/B*02601, B*08202, {B*0460101/0202/09/15}, {B*05104}                                                                                                               |
| InB29    | 8  | B*04001/02, B*0440101/0102/02/03/04/05, B*00501/02, {B*06003}                                                                                                                                  |
| InB13    | 6  | B*04101, B*04801, Mm-B* <i>nov013</i> , {B*06401}, {B*09601}                                                                                                                                   |
| InB25    | 5  | B*06901, B*06501/02, B*05002/B*07801, Mm-B* <i>nov019</i> , {B*05104}                                                                                                                          |
| InB11a   | 4  | B*01201, B*03801, B*07401/02/02v1, B*08202, B*05701, B*03001/0301/0302/0303/04, B*0460101/0202/09/15, B*05302, Mm-B* <i>nov017</i> , {B*07001}, {Mm-B* <i>nov001</i> }, {Mm-B* <i>nov008</i> } |
| InB11b   | 4  | B*01201, B*02201, B*07401/02/02v1, B*03101/02, B*05701/02/B*02601, {B*03001/0301/0302/0303/04}, {B*04901/B*03501}, {Mm-B* <i>nov013</i> }, {Mm-B* <i>nov017</i> }                              |
| InB17    | 3  | B*01701, B*0290102, B*06002, Mm-B* <i>nov037</i>                                                                                                                                               |
| InB2     | 2  | B*03801, B*04701, B*08202                                                                                                                                                                      |
| InB18    | 2  | B*05501, B*05802, B*05201, B*0460101/0202/09/15                                                                                                                                                |
| InB20    | 2  | B*02101/03, B*02801, B*02001/B*06803, B*0460102/0103/0201/08, B*07201/02, B*08201, Mm-B* <i>nov038</i> , Mm-B* <i>nov039</i>                                                                   |
| InB32    | 1  | B*03601, B*03701, B*04503                                                                                                                                                                      |
| InBnov 1 | 3  | B*02703, B*03001/0301/0302/0303/04, B*04301, B*07401/02/02v1, B*09201                                                                                                                          |

Chinese rhesus chromosomes (n = 72)

|           |   |                                                                                                                                 |
|-----------|---|---------------------------------------------------------------------------------------------------------------------------------|
| ChB 1     | 5 | B*01010101/02, B*00702/03, B*03002/05, Mm-B* <i>nov012</i> , {B*0460301/05/07/10/14}                                            |
| ChB 5     | 4 | B*00301/01, B*00401, B*00501/02, B*01101, B*06002, Mm-B* <i>nov004</i> , Mm-B* <i>nov033</i>                                    |
| ChB 9     | 3 | B*04001/02, B*0680102/02/05, {B*06002}                                                                                          |
| ChB 13    | 3 | B*01401, B*05901, B*06503, B*0790101/02, Mm-B* <i>nov014</i> , Mm-B* <i>nov015</i> , Mm-B* <i>nov018</i> , {B*05103}, {B*04606} |
| ChB 15    | 3 | B*00702/03, B*03901                                                                                                             |
| ChB 8     | 2 | B*0440101/0102/02/03/04/05, B*085001/02, B*06201                                                                                |
| ChB2      | 1 | B*01902, B*02401, B*05702/B*02601, {B*0460101/0202/09/15}, {B*05104}                                                            |
| ChB nov 1 | 3 | B*06503, B*09001, Mm-B* <i>nov014</i> , Mm-B* <i>nov015</i> , Mm-B* <i>nov016</i> , B*0460102/0103/0201/08, B*04606             |
| ChB nov 2 | 2 | B*03002/05, B*06803/B*02001, B*08201, B*08701, Mm-B* <i>nov026</i> , Mm-B* <i>nov036</i> , Mm-B* <i>nov074</i>                  |
| ChB nov 3 | 4 | B*02401, B*05702/B*02601, B*6701/02, B*07201/02, Mm-B* <i>nov018</i> , Mm-B* <i>nov030</i> , {B*0460101/0202/09/15}, {B*05104}  |
| ChB nov 4 | 3 | B*00401, B*01902, B*08901, B*07201/02, Mm-B* <i>nov011</i>                                                                      |
| ChBnov 5  | 2 | B*01701/02, B*08301, B*06502, B*08201, B*0460301/05/07/10/14, B*07201/02, Mm-B* <i>nov018</i> , Mm-B* <i>nov032</i>             |
| ChB nov 6 | 2 | Mm-B* <i>nov022</i> , B*06902/03, B*0680101, B*06601, B*06002, B*05103, Mm-B* <i>nov020</i>                                     |
| ChB nov 7 | 3 | B*04101, B*04802, B*0460101/0202/09/15, B*05104, B*0790101/02, B*08901, Mm-B* <i>nov013</i>                                     |
| ChB nov 8 | 2 | Mm-B* <i>nov065</i> , Mm-B* <i>nov048</i> , B*08202, B*0460102/0103/0201/08, Mm-B* <i>nov047</i> , Mm-B* <i>nov074</i>          |

### Supplementary Figure 7. Inferred Mamu-A and Mamu-B class I haplotypes.

Mamu-A haplotypes are inferred based on allele sharing between multiple unrelated individuals. Mamu-B haplotypes are based on the framework sequences reported by Otting and coworkers<sup>5,6</sup>. Brackets { } indicate class I sequences that were only detected in at least two thirds of the observed haplotypes in our cohort.



## Supplementary Note

### Macaque samples.

We obtained fresh, whole blood samples from eight feral Mauritian cynomolgus macaques housed at the Wisconsin National Primate Research Center (Madison, WI) or Charles River BRF, Inc. (Houston, TX). Additionally, we obtained four blood samples from a cynomolgus macaque breeding group from Alpha Genesis, Inc. (Yeemasse, SC). Thirty-two whole blood or frozen peripheral blood mononuclear cell samples from Indian-origin rhesus macaques were provided by investigators at the Oregon National Primate Research Center and the New England Primate Research Center, respectively. Likewise, 36 Chinese-origin rhesus macaque samples were provided by NIAID (Bethesda, MD) and Battelle (Columbus, OH). Finally, we acquired 12 pig-tailed macaque frozen peripheral blood mononuclear cell samples from the University of Pennsylvania (Philadelphia, PA) and Johns Hopkins University (Baltimore, MD). All animals were cared for according to the regulations and guidelines of the Institutional Care and Use Committees at their respective institutions.

### Primary cDNA-PCR and pooling strategy.

We isolated total cellular RNAs with a MagNAPure LC (Roche Applied Sciences) using a protocol that included a DNase treatment to remove contaminating genomic DNA. We converted RNA samples to cDNA using a Superscript™III First-Strand Synthesis System (Invitrogen). We generated primary cDNA-PCR amplicons spanning 190 bp of exon two of macaque class I sequences with high-fidelity Phusion™ polymerase (New England Biolabs). The PCR primers contained one of 12 distinct 10 bp MID tags along with adaptor sequences necessary for emulsion PCR. We used the following primer sequences; each of the 10 bp Multiplex Identifier (MID) tags has been highlighted in bold:

#### Sense-strand PCR primers

|                  | GS-FLX-A adaptor       | MIDx Tag         | Class I-specific        |
|------------------|------------------------|------------------|-------------------------|
| GSA-MID1-SBT190F | 5'-GCCTCCCTCGCGCCATCAG | <b>ACGAGTGC</b>  | GTGCTACGTGGACGACACG-3'  |
| GSA-MID2-SBT190F | 5'-GCCTCCCTCGCGCCATCAG | <b>ACGCTCG</b>   | ACAGCTACGTGGACGACACG-3' |
| GSA-MID3-SBT190F | 5'-GCCTCCCTCGCGCCATCAG | <b>AGACGCACT</b> | CGCTACGTGGACGACACG-3'   |
| GSA-MID4-SBT190F | 5'-GCCTCCCTCGCGCCATCAG | <b>AGCACTGT</b>  | AGCTACGTGGACGACACG-3'   |
| GSA-MID5-SBT190F | 5'-GCCTCCCTCGCGCCATCAG | <b>ATCAGACAC</b> | GGCTACGTGGACGACACG-3'   |
| GSA-MID6-SBT190F | 5'-GCCTCCCTCGCGCCATCAG | <b>ATATCGC</b>   | GAGGCTACGTGGACGACACG-3' |
| GSA-MID7-SBT190F | 5'-GCCTCCCTCGCGCCATCAG | <b>CGTGTCTCT</b> | AGCTACGTGGACGACACG-3'   |
| GSA-MID8-SBT190F | 5'-GCCTCCCTCGCGCCATCAG | <b>CTCGCGTGT</b> | CGCTACGTGGACGACACG-3'   |

GSA-MID9-SBT190F 5'-GCCTCCCTCGCGCCATCAGTAGTATCAGAGCTACGTGGACGACACG-3'  
 GSA-MID10-SBT190F 5'-GCCTCCCTCGCGCCATCAGTCTCTATGCGGCTACGTGGACGACACG-3'  
 GSA-MID11-SBT190F 5'-GCCTCCCTCGCGCCATCAGTGATACGCTCGCTACGTGGACGACACG-3'  
 GSA-MID12-SBT190F 5'-GCCTCCCTCGCGCCATCAGTACTGAGCTAGCTACGTGGACGACACG-3'

Antisense-strand PCR primers

GS-FLX-B adaptor MIDx Tag Class I-specific

GSB-MID1-SBT190R 5'-GCCTTGCCAGCCCGCTCAGACGAGTGCCTTCGCTCTGGTTGTAGTAGC-3'  
 GSB-MID2-SBT190R 5'-GCCTTGCCAGCCCGCTCAGACGCTCGACATCGCTCTGGTTGTAGTAGC-3'  
 GSB-MID3-SBT190R 5'-GCCTTGCCAGCCCGCTCAGAGACGCACTTCGCTCTGGTTGTAGTAGC-3'  
 GSB-MID4-SBT190R 5'-GCCTTGCCAGCCCGCTCAGAGCACTGTAGTCGCTCTGGTTGTAGTAGC-3'  
 GSB-MID5-SBT190R 5'-GCCTTGCCAGCCCGCTCAGATCAGACAGTCGCTCTGGTTGTAGTAGC-3'  
 GSB-MID6-SBT190R 5'-GCCTTGCCAGCCCGCTCAGATATCGCGAGTCGCTCTGGTTGTAGTAGC-3'  
 GSB-MID7-SBT190R 5'-GCCTTGCCAGCCCGCTCAGCGTGTCTCTATCGCTCTGGTTGTAGTAGC-3'  
 GSB-MID8-SBT190R 5'-GCCTTGCCAGCCCGCTCAGTCTCGCTGTCTCGCTCTGGTTGTAGTAGC-3'  
 GSB-MID9-SBT190R 5'-GCCTTGCCAGCCCGCTCAGTAGTATCAGATCGCTCTGGTTGTAGTAGC-3'  
 GSB-MID10-SBT190R 5'-GCCTTGCCAGCCCGCTCAGTCTCTATGCGTCGCTCTGGTTGTAGTAGC-3'  
 GSB-MID11-SBT190R 5'-GCCTTGCCAGCCCGCTCAGTGATACGCTTCGCTCTGGTTGTAGTAGC-3'  
 GSB-MID12-SBT190R 5'-GCCTTGCCAGCCCGCTCAGTACTGAGCTATCGCTCTGGTTGTAGTAGC-3'

We used the following PCR program with a MJ Research Tetrad Thermocycler (Bio-Rad Laboratories) to generate the primary cDNA-PCR amplicons: initial denaturation at 98 °C for 3 min; amplification over 23 cycles of 98 °C for 5 s, 57 °C for 1 s, 72 °C for 20 s, and a final extension of 72 °C for 5 min. Aliquots of each reaction were monitored by agarose gel electrophoresis and subjected to an additional 3–6 cycles of PCR if necessary to generate sufficient product. After agarose gel electrophoresis and MinElute PCR purification (Qiagen), we quantified primary amplicons with a Qubit Fluorometer (Invitrogen) and normalized them to equimolecular concentrations. We pooled amplicons from groups of 12 animals and confirmed their purity with a 2100 BioAnalyzer (Agilent Technologies). Four additional Indian rhesus samples were lost in our pilot study due to a pipeting error.

**Emulsion PCR and pyrosequencing.**

We performed the emulsion PCR, bead recovery, and pyrosequencing steps following the manufacturer's GS FLX protocols<sup>1,2</sup> at the 454 Sequencing Center (Branford, CT) and the University of Illinois at Urbana-Champaign High-Throughput Sequencing Center for the pilot and follow-up studies, respectively. For our pilot study, we physically subdivided a single 70x75 PicoTiterPlate into four regions to allow simultaneous pyrosequencing of pooled amplicons with twelve distinct MID tags from cynomolgus, pig-tailed, Indian-origin and Chinese-origin rhesus macaques. To examine the effect of reducing sequencing depth on MHC class I sequence profiles, we sequenced four pools containing amplicons from 48 rhesus macaques in 1/16 regions

of a 70x75 PicoTiterPlate for our follow-up study. From this instrument run using only 1/4 of a PicoTiterPlate, we acquired 40,879 high quality sequence reads containing a total of 8,713,026 high quality bases. Pyrosequence images were captured by a high resolution CCD camera and processed to generate flowgrams for each well as described previously<sup>1,2</sup>. We acquired 490,243 high quality sequence reads containing a total of 102,177,657 high quality bases from the pilot run. We obtained an average high quality read length of 208.4 bases, allowing detection of the MID tags at both the 5' and 3' ends of most amplicons (each 190 bp amplicon contained the same 10 bp MID on each end).

### **Data analysis.**

Improvements in GS FLX pyrosequencing technology have substantially decreased error rates compared to the previous GS 20 platform<sup>3</sup>. In order to insure the accuracy of genotypes and to evaluate the error rate of MHC genotyping by GS FLX pyrosequencing, we employed a multi-step analysis procedure combining both automated and manual analyses to cull sequence artifacts associated with cDNA-PCR and GS FLX pyrosequencing. We initially assembled unfiltered high quality reads into contigs of identical sequences (five or more sequences for the pilot study, two or more sequences for the follow-up study) using SeqMan Pro Version 8.0.2 (DNASTAR). This automated filter step removed most obvious artifacts, allowing for minimal manual downstream editing. We then established a first pass genotype of each animal by aligning all sequence contigs against a custom in-house database of all known macaque MHC class I sequences. The majority of contigs comprised sequence reads that were identical to previously described class I sequences (**Supplementary Fig. 5** online), and we used this complement of known sequences per animal to evaluate the remaining unknown sequence contigs detected in each animal. We designated the remaining unknown contigs as putative novel class I alleles if they were: A) not closely related to other known class I sequences expressed by the animal and either B) detected as >10 reads or C) detected in multiple animals. In a detailed analysis of all high quality sequence reads for the three animals illustrated in **Fig. 2**, we found that 93.4% were consistent with known MHC class I sequences or novel class I sequences confirmed by inter- and intra-animal comparison (**Table 1**). Unknown contigs comprising a limited number of individual sequence reads which differed from known sequences present in the animal by a single nucleotide were excluded from further analysis. Most often these minor sequence contigs contained single base insertions or deletions in

homopolymeric nucleotide runs created by errors in the GS FLX pyrosequencing process. For the animals shown in **Fig. 2**, more than half of these minor sequence contigs were insertions or deletions in short homopolymer tracts that have been well documented as errors associated with the GS FLX pyrosequencing process<sup>1-4</sup>. A subset of these minor contigs was consistent with single nucleotide misincorporations during reverse transcription or the primary cDNA-PCR. One quarter of the putative artifactual reads found in the **Fig. 2** animals were likely due to nucleotide misincorporations during reverse transcription or the primary PCR amplification with Phusion™ High-Fidelity DNA polymerase; these likely sequence artifacts contained single base substitutions relative to another class I sequence expressed by the same animal. A third, minor class of artifacts contained multiple base substitutions relative to high abundance class I sequences expressed by an animal. Given the high degree of sequence polymorphism within the 190 bp region of our amplicon between MHC class I sequences expressed by an individual animal, it is unlikely that such unknown sequences represent novel class I alleles. These sequences most likely resulted from template switching during reverse transcription or the primary cDNA-PCR (resulting in chimera formation), although we cannot fully exclude minor contamination of the RNA samples used for cDNA synthesis with genomic DNA (each macaque MHC haplotype is expected to contain multiple class I pseudogenes). Additional artifacts are those sequences that failed to reach at least 180 bp in length, adding some uncertainty to their identity during the assembly process. 1.1% of the total sequence reads for the three animals shown in **Fig. 2** constituted reads that were <180 bp long. As expected, we identified more putative novel sequences in Chinese-origin rhesus and pig-tailed macaques with less well-characterized MHC class I genetics than in the well-characterized Mauritian-origin cynomolgus and Indian-origin rhesus macaques (**Supplementary Fig. 1** online).

#### **Amplification primer mismatches with MHC class I sequences.**

We also manually edited a small subset of class I sequences that we missed by BLASTN analysis as perfect hits due to single base mismatches introduced by the PCR primers (*e.g. Mamu-B\*03801* differs from the 5' primer by a single nucleotide). The MHC class I sequences of rhesus macaques shown below have single base pair mismatches with the amplification primers and may therefore be underrepresented to varying degrees in the transcript abundance data. These



*Mamu-B\*061021like* (AB430442) . T . . . . .  
*Mamu-B\*07801* (EF611164) . T . . . . .  
*Mamu-B\*09301* (AM902585) . . . . . T .  
*Mamu-B\*09801* (FJ544408) . . . . . G . . . . .  
*Mamu-E\*0112* (EU305658) A . . . . .  
*Mamu-E\*0113* (EU305659) A . . . . .  
*Mamu-E\*0115* (EU305661) A . . . . .  
*Mamu-I\*010603* (EU305656) . . A . . . . .

## References

1. Thomas, R.K. *et al.* Sensitive mutation detection in heterogeneous cancer specimens by massively parallel picoliter reactor sequencing. *Nat. Med.* **12**, 852–855 (2006).
2. Wheeler, D.A. *et al.* Complete genome sequence of an individual by massively parallel DNA sequencing. *Nature* **452**, 872–876 (2008).
3. Quinlan, A.R. Stewart, D.A., Stromberg, M.P. & Marth, G.T. Pyrobayes: An improved base caller for SNP Discovery in pyrosequences. *Nat. Methods* **5**, 179–181 (2008).
4. Campbell, P.J. *et al.* Subconal phylogenetic structures in cancer revealed by ultra-deep sequencing. *Proc. Natl. Acad. Sci. USA* **105**, 13081–13086 (2008).
5. Otting, N. *et al.* Unparalleled complexity of the MHC class I region in rhesus macaques. *Proc. Natl. Acad. Sci. USA* **102**, 1626–1631 (2005).
6. Otting, N. *et al.*, A snapshot of the *Mamu-B* genes and their allelic repertoire in rhesus macaques of Chinese origin. *Immunogenetics* **60**, 507–514 (2008).
7. Wiseman, R.W. *et al.* Simian immunodeficiency virus SIVmac239 infection of major histocompatibility complex-identical cynomolgus macaques from Mauritius. *J. Virol.* **81**, 349–361 (2007).
